# Supplementary material for: Retracted Article: High performance liquid chromatography coupled with high resolution mass spectrometry-based characterization of lipidomic responses from rats with kidney injuries
Source: Royal Society of Chemistry journal article supplement (doi:10.1039/c8ra02805b), 2018-01-01
Supplement: c8ra02805b1.pdf [file c8ra02805b1.pdf]

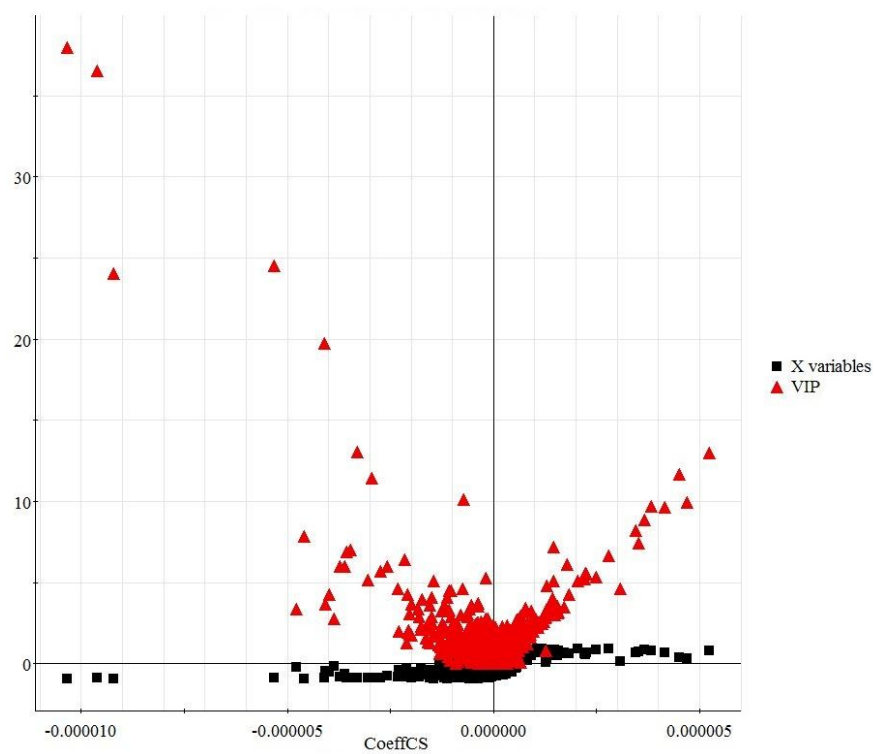

Fig.S1. VIP-plot based on the matched PLS-DA model for the interesting variables in positive ion mode.
